# Supplementary material for: The Omega-3 Fatty Acids EPA and DHA, as a Part of a Murine High-Fat Diet, Reduced Lipid Accumulation in Brown and White Adipose Tissues
Source: PubMed Central journal article supplement (PMC6928976; doi:10.3390/ijms20235895), 2019-11-24
Supplement: ijms-20-05895-s001.pdf [file ijms-20-05895-s001.pdf]

**Supplemental Table S1** Selection of animals for microarray analysis.

| <b>Animals group</b> | <b>Animal ID</b> | <b>Body weight (g)</b> | <b>plasma TG (mM)</b> | <b>plasma chol. (mM)</b> |
|----------------------|------------------|------------------------|-----------------------|--------------------------|
| Control              | 3527             | 31.2                   | 1.24                  | 8.2                      |
| Control              | 7343             | 37.4                   | 0.92                  | 4.8                      |
| <b>Control</b>       | 5122             | 29.8                   | 1.12                  | 6,0                      |
| <b>Control</b>       | 7037             | 30,0                   | 0.52                  | 4.6                      |
| <b>Control</b>       | 3377             | 28.1                   | 1,00                  | 4.8                      |
| <b>Control</b>       | 0311             | 28.4                   | 0.88                  | 6.4                      |
| Control              | 4356             | 33,0                   | 1.12                  | 5.2                      |
| Control              | 5807             | 32.8                   | 0.72                  | 5.2                      |
| Control              | 0104             | 31.6                   | 0.4                   | 4.8                      |
| <b>HFD_EPA/DHA</b>   | 2824             | 30.5                   | 0.92                  | 5.4                      |
| <b>HFD_EPA/DHA</b>   | 0864             | 26.7                   | 1.12                  | 7,0                      |
| HFD_EPA/DHA          | 6534             | 30                     | 0.84                  | 6,0                      |
| HFD_EPA/DHA          | 7887             | 30.3                   | 0.68                  | 4.8                      |
| HFD_EPA/DHA          | 6304             | 30.2                   | 1.04                  | 5.4                      |
| <b>HFD_EPA/DHA</b>   | 7011             | 23.5                   | 0.92                  | 6.4                      |
| HFD_EPA/DHA          | 5345             | 31.1                   | 1.2                   | 4.2                      |
| <b>HFD_EPA/DHA</b>   | 6572             | 29.4                   | 2,00                  | 4.6                      |
| HFD_EPA/DHA          | 2790             | 27.1                   | 1.16                  | 6,0                      |
| HFD_EPA/DHA          | 5304             | 32                     | 1.16                  | 5.2                      |
| HFD_EPA/DHA          | 7538             | 27.4                   | 1.16                  | 8,0                      |
| HFD_EPA/DHA          | 4869             | 24.7                   | 1,00                  | 2.8                      |
| <b>HFD_corn oil</b>  | 1787             | 26                     | 0.64                  | 4                        |
| HFD_corn oil         | 9895             | 25.2                   | 0.48                  | 3.2                      |
| <b>HFD_corn oil</b>  | 6524             | 21.3                   | 0.56                  | 3.6                      |
| HFD_corn oil         | 5592             | 24.3                   | 0.44                  | 3                        |
| HFD_corn oil         | 5008             | 24.8                   | 0.56                  | 5                        |
| <b>HFD_corn oil</b>  | 3014             | 24.4                   | 0.84                  | 6.4                      |
| HFD_corn oil         | 6523             | 25.9                   | 0.72                  | 5.6                      |
| HFD_corn oil         | 9101             | 25                     | 0.64                  | 5.4                      |
| <b>HFD_corn oil</b>  | 3358             | 27                     | 0.92                  | 6                        |
| HFD_corn oil         | 2539             | 23.5                   | 0.72                  | 7                        |
| HFD_corn oil         | 1091             | 22.2                   | 1.12                  | 10                       |
| HFD_corn oil         | 1088             | 22.2                   | 0.4                   | 3.6                      |

The animals marked in bold letters were selected for microarray analysis.
